# Supplementary material for: Mass Cytometry as a Tool for Investigating Senescence in Multiple Model Systems
Source: MDPI journal article supplement (doi:10.3390/cells12162045), 2023-08-11
Supplement: s1 [file s1]

Figure S1

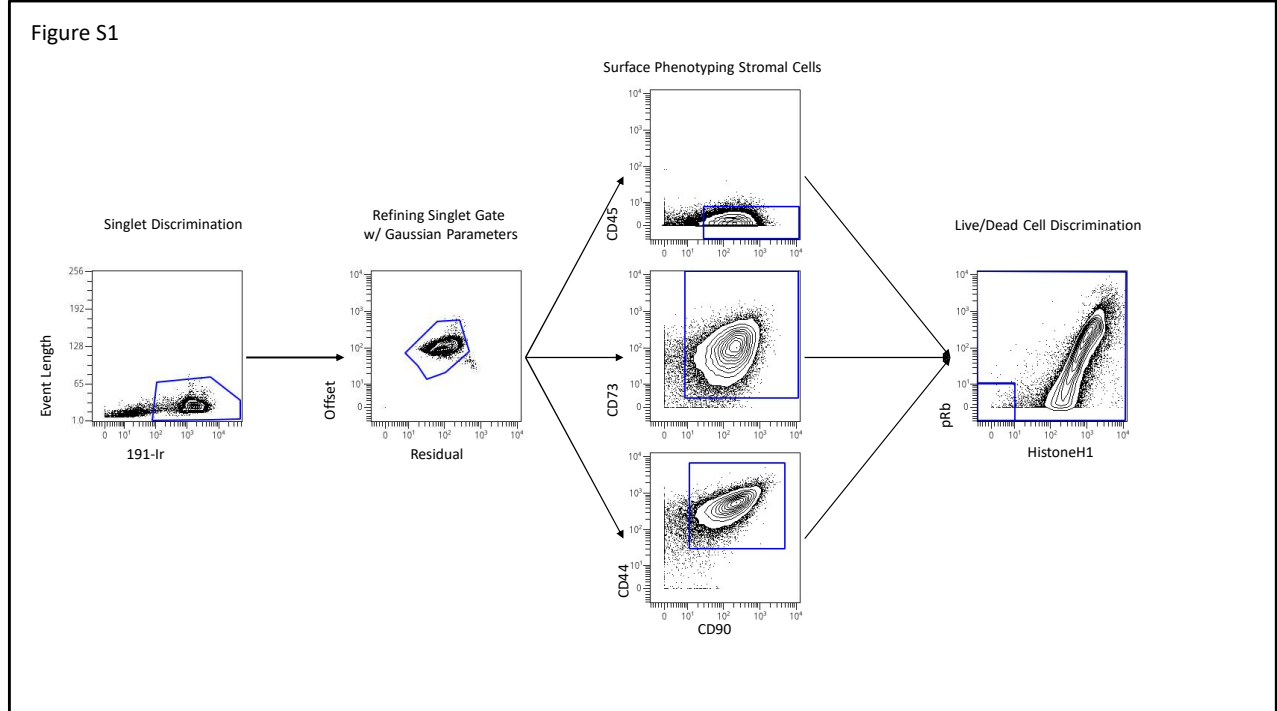

Figure S1. In order to assure only stromal cells were considered for mass cytometry (MC) analysis, a combination of surface and intracellular markers were used to isolate living stromal cells. Initial debris and doublets were removed through the use of the singlet gate, this was further refined by using the Gaussian parameters to remove additional debris and doublets. Surface markers were used next to isolate stromal cells specifically as there are multiple cell types present in femur head extractions. Once stromal cells were isolated in order to ensure only living cells were considered for senescence marker analysis the pRb by H1 gate was used to isolate living cells according to previously published studies.

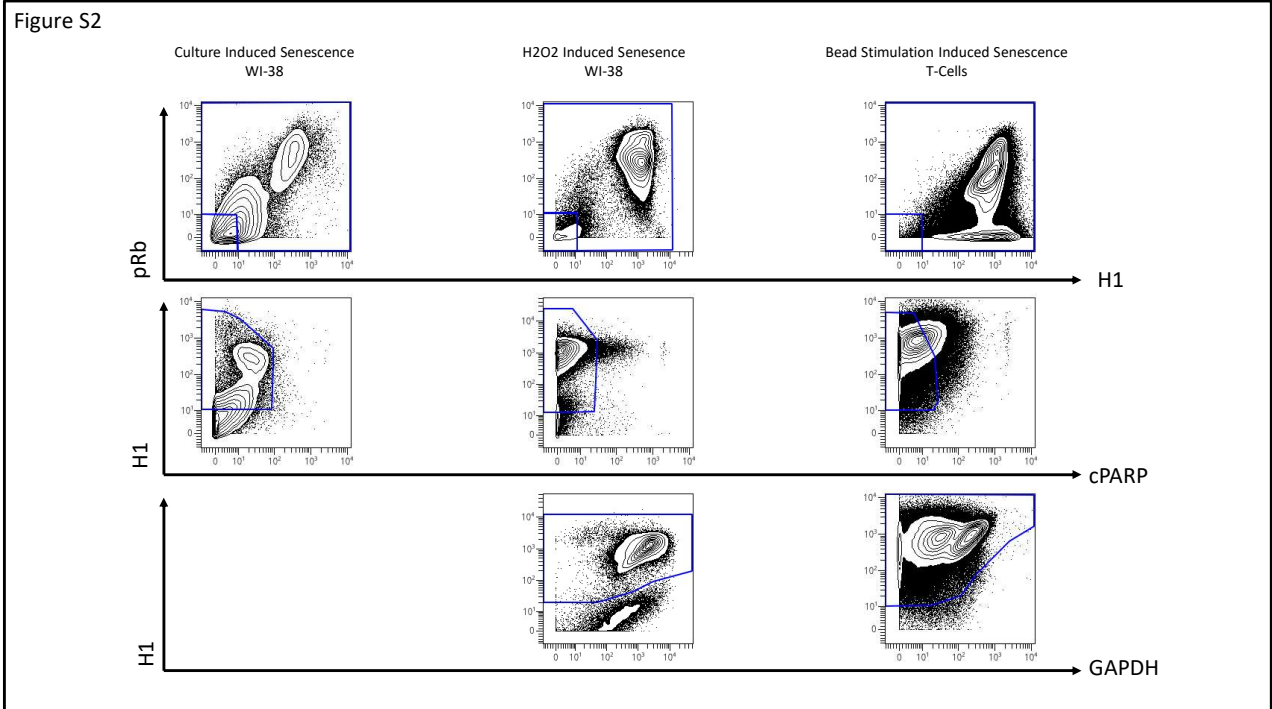

Figure S2. Gating of live cells as described previously are shown with an example of each experiment. Initial BMSC experiments did not contain the GAPDH antibody so it is excluded. Subsequent experiments included a GAPDH antibody as an additional measure of live/dead discrimination. All subsequent analysis was run on these living cells to ensure cells that were dead or dying would be excluded from the final findings.

Figure S3

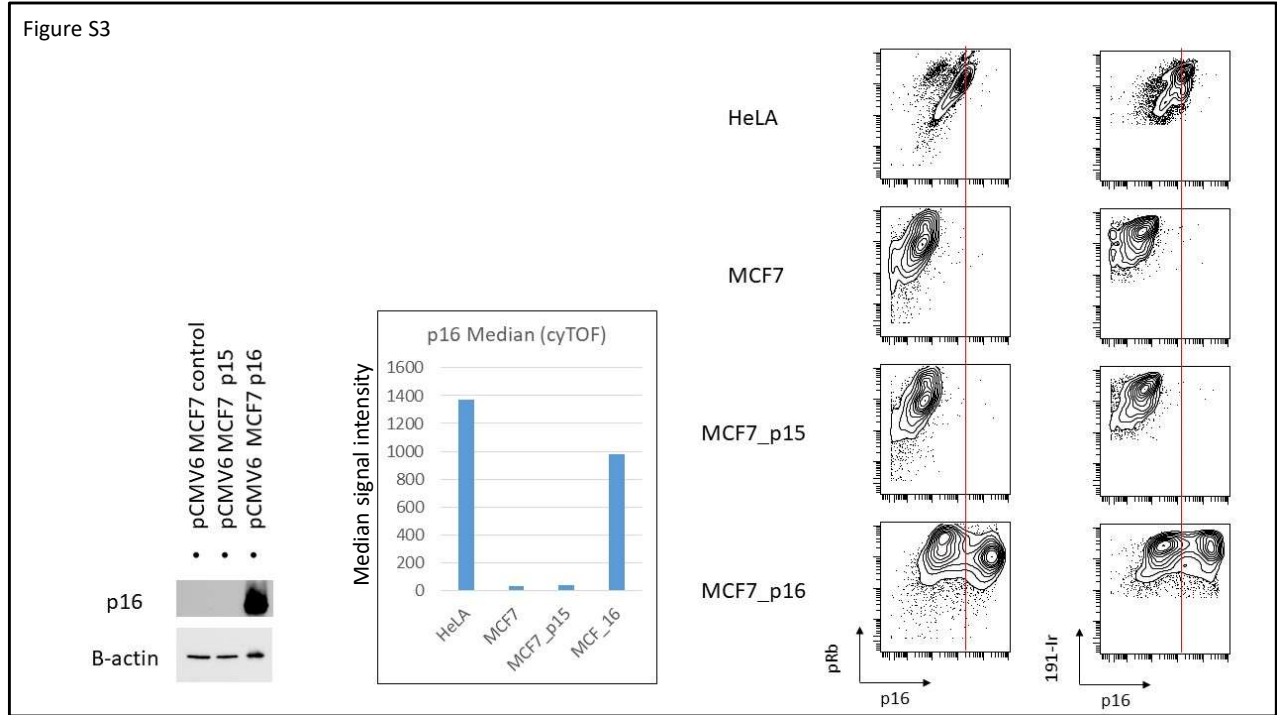

Figure S3. Validation of a p16 antibody was done in MCF7 cells that had been transfected with either a p15 or p16 construct. The expression of p16 was then validated both by western blot and mass cytometry against the standard of HeLA cells. The p15 transfection showed no cross reactivity with the p16 antibody in either western blotting or mass cytometry and this antibody was used for all future experiments.

Figure S4

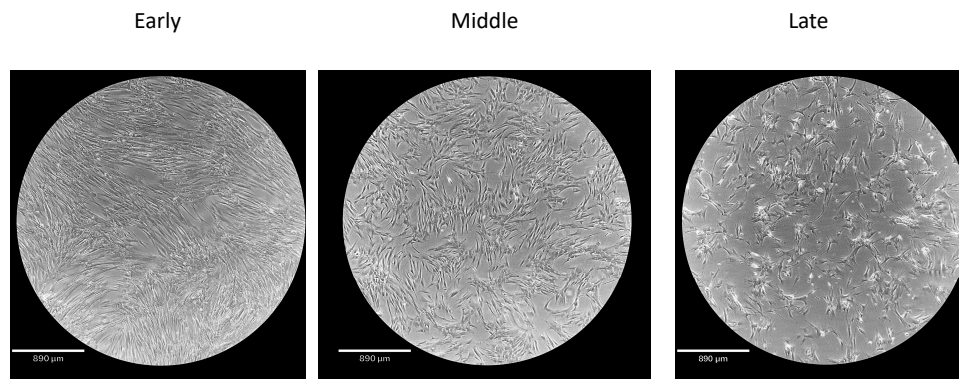

Figure S4. Representative brightfield images of one of the BMSC samples showing the morphological changes that occur during sequential passaging the development into senescence. Scale located in the lower left of each image.

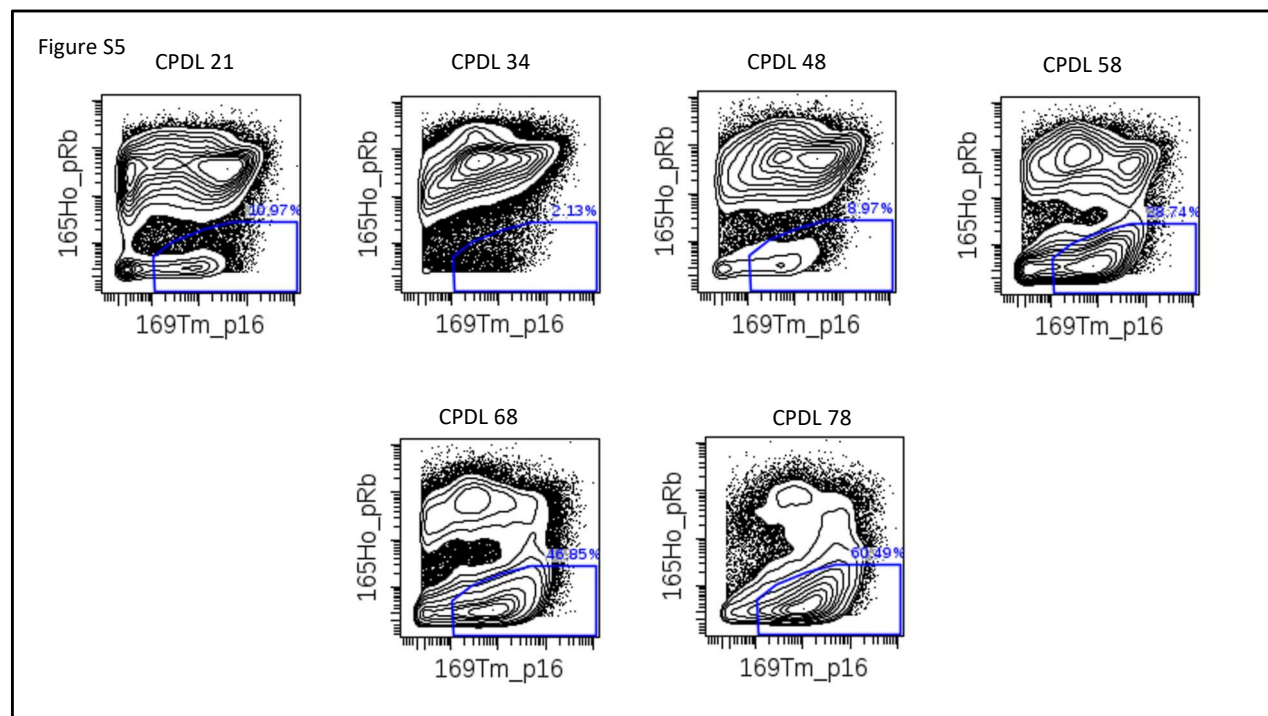

Figure S5. Changes in the p16<sup>+</sup>/pRb<sup>-</sup> expression in repeatedly cultured WI38 cells

Figure S6

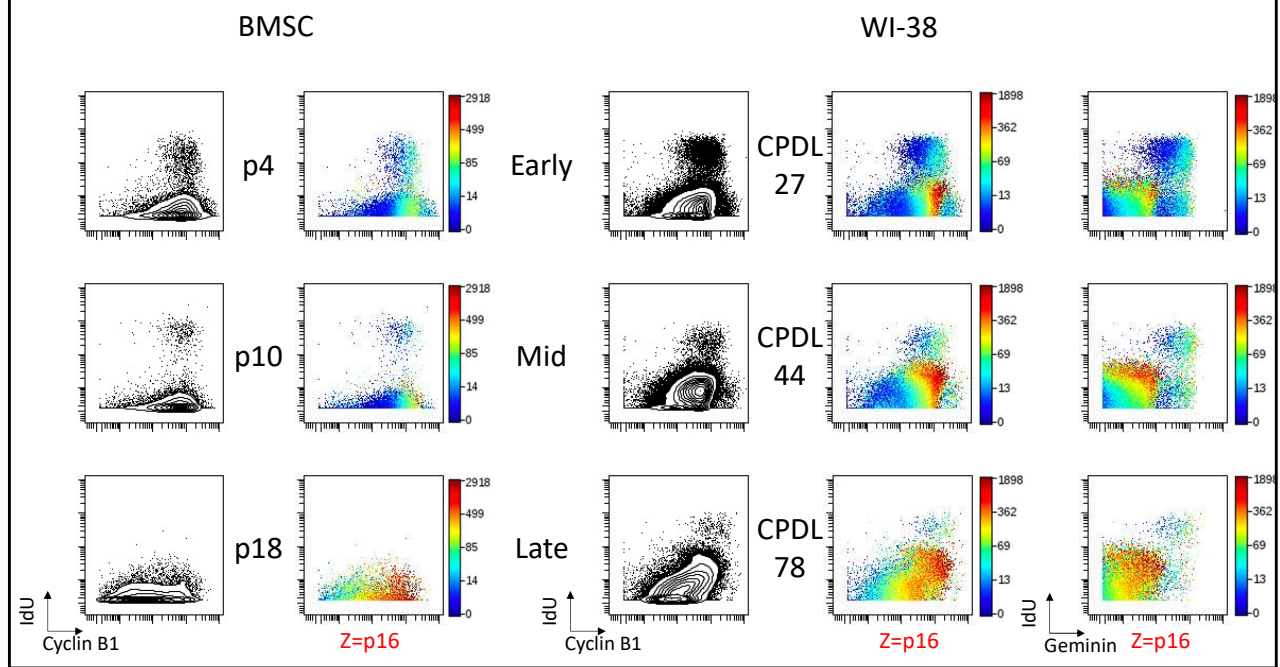

Figure S6. Expression of p16 is highest at G1-S phase boundary and at moderate levels in G0 and G1 cells at later passages. Plots of IdU (DNA synthesis) and Cyclin B1 are shown for representative BMSC (sample 151696) and WI-38 samples. Cell events are plotted as contour plots and dot plots colored for p16 expression level for early, mid, and late passages (as indicated by passage or CPDL number).

Figure S7

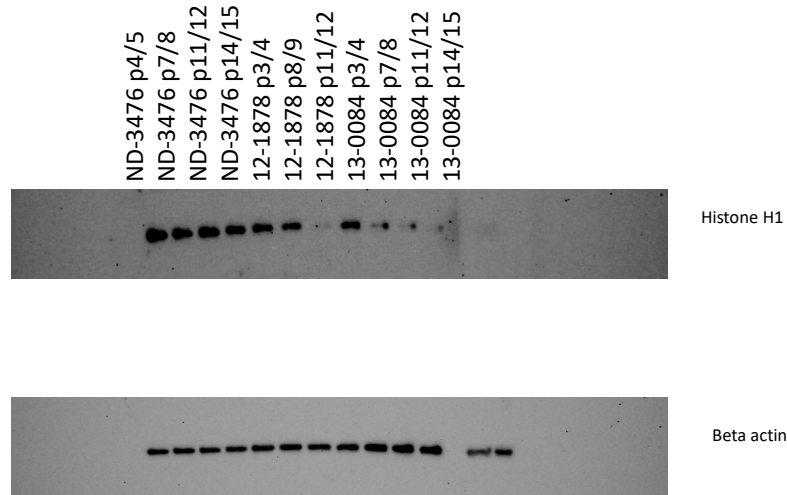

Figure S7. Stromal cells were tested for HistoneH1 expression in order to understand chromatin accessibility. In some stromal cells there was a reduced expression of HistoneH1 which has been reported previously in other studies. In some cells, however, there was no change in the expression of HistoneH1 which has also been reported in previous studies. Reduced expression of HistoneH1 is not consistent across multiple senescent models as noted in previous studies. Three primary stromal samples were tested in this western blot (alphanumeric IDs: ND-3476, 12-1878 and 13-0084).

Figure S8

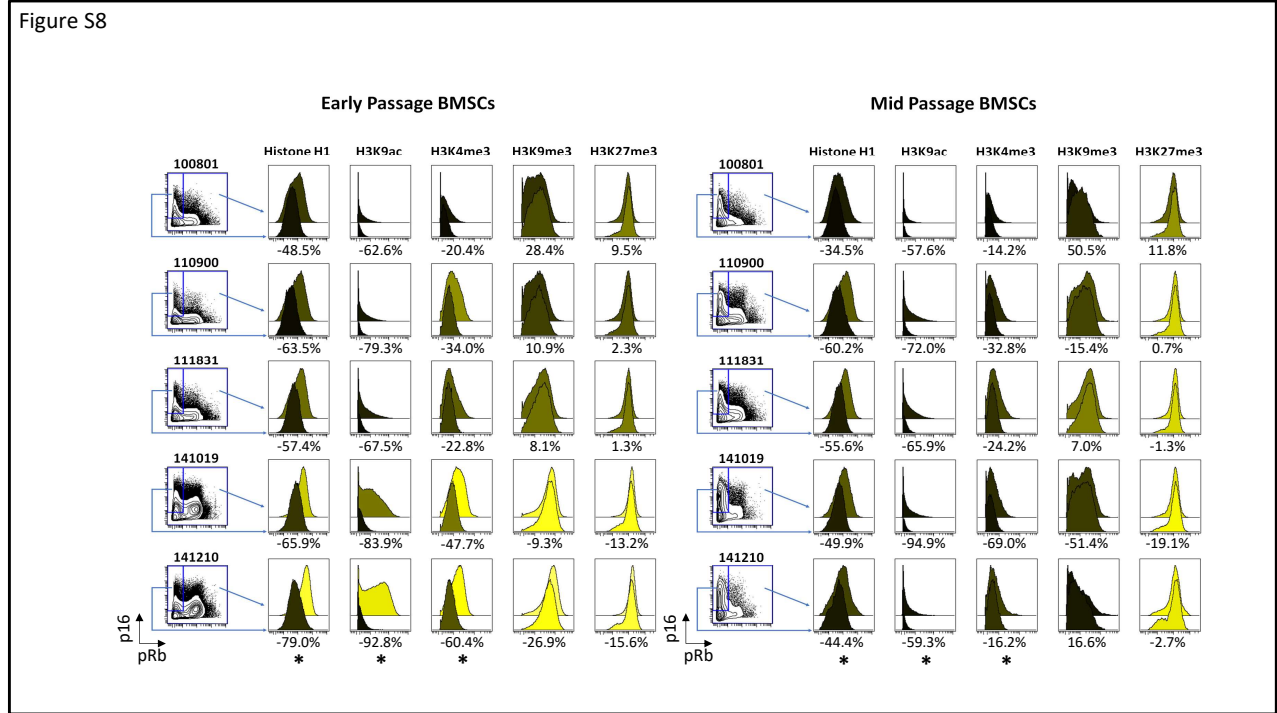

Figure S8. Changes in histone mark modifications between senescent (p16<sup>hi</sup>,pRb<sup>low</sup>; bottom histograms) vs. all other cells (top histograms) in BMSC samples from early and mid passages. Comparisons were not shown for the late passage as many samples lacked significant numbers of non-senescent cells at this timepoint. Changes were significant (indicated by \*) for total Histone H1 (p=0.001), H3K9ac (p=0.037), and H3K4me3 (p=0.015).



Figure S9

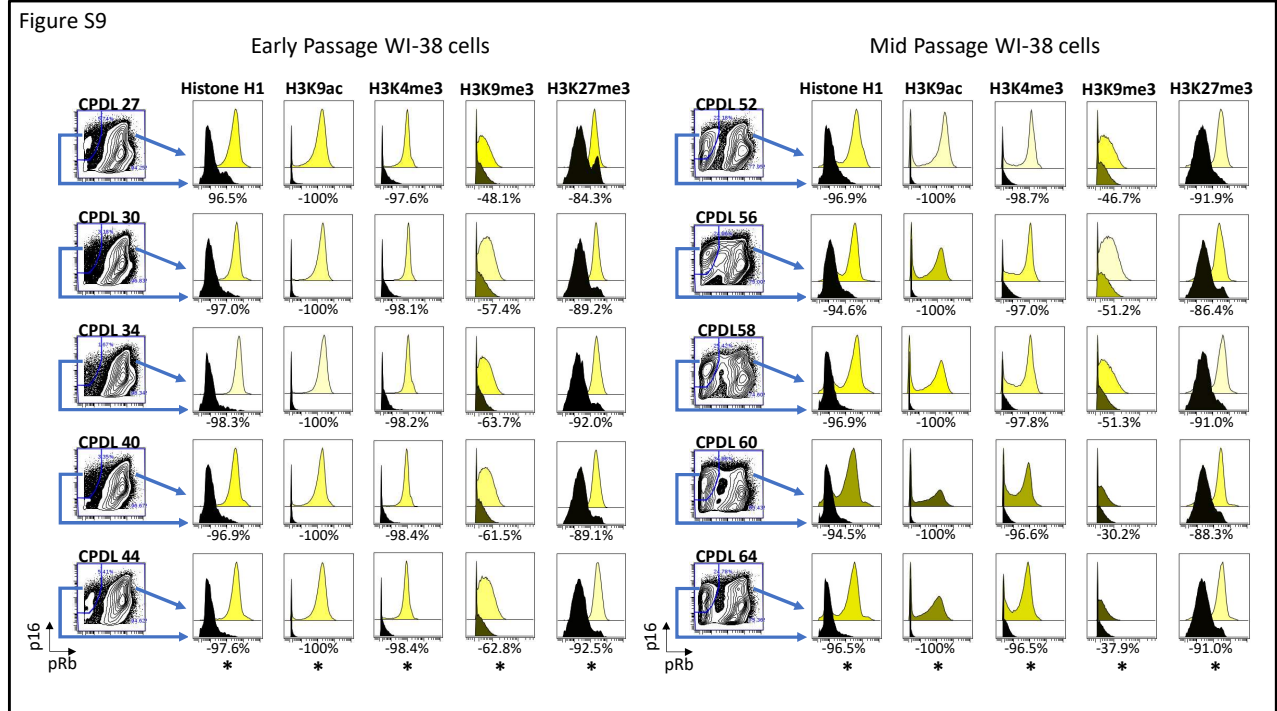

Figure S10

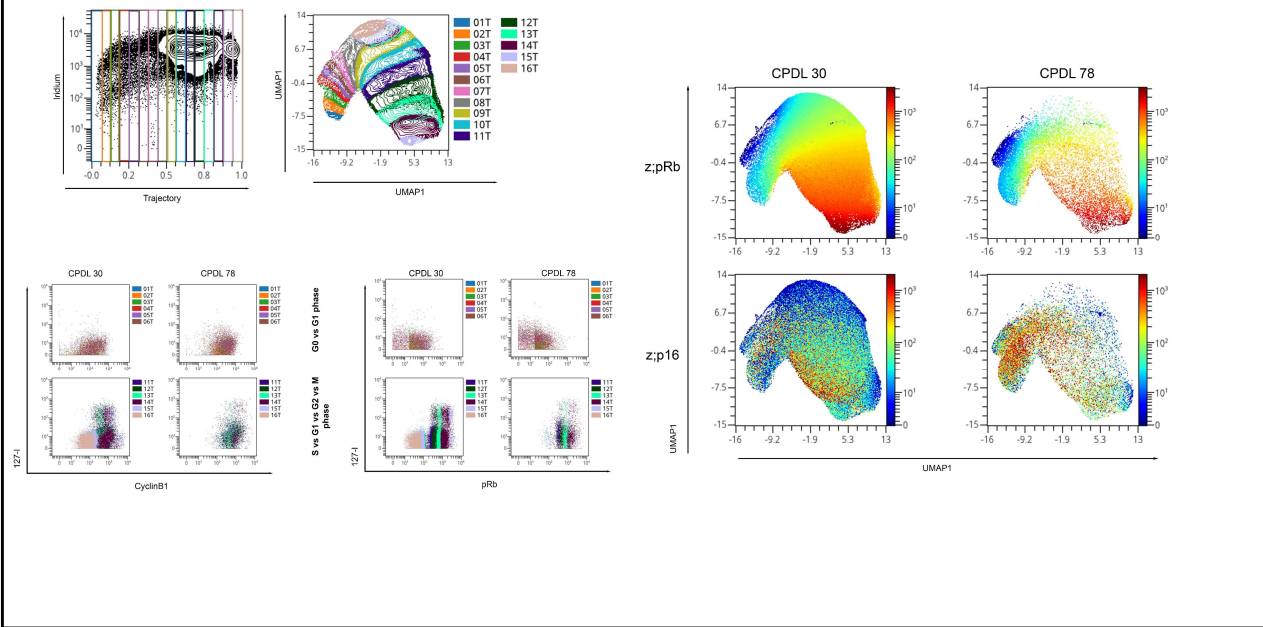

Figure S10. The wanderlust progression analysis takes the input data and slice it to develop a trajectory as shown here. The algorithm develops a trajectory parameter based on user input for the start point (0.0). This demonstrates how the trajectory parameter can be superimposed on the UMAP analysis to demonstrate the progression from the user defined start point to the end of the data. This is projected in the progression analysis as a pseudo-time across multiple samples where protein expression is plotted across the trajectory slices. In order to be consistent across multiple different model systems all progression analyses were run with the starting point set to the highest p16 expressing cells.

Figure S11

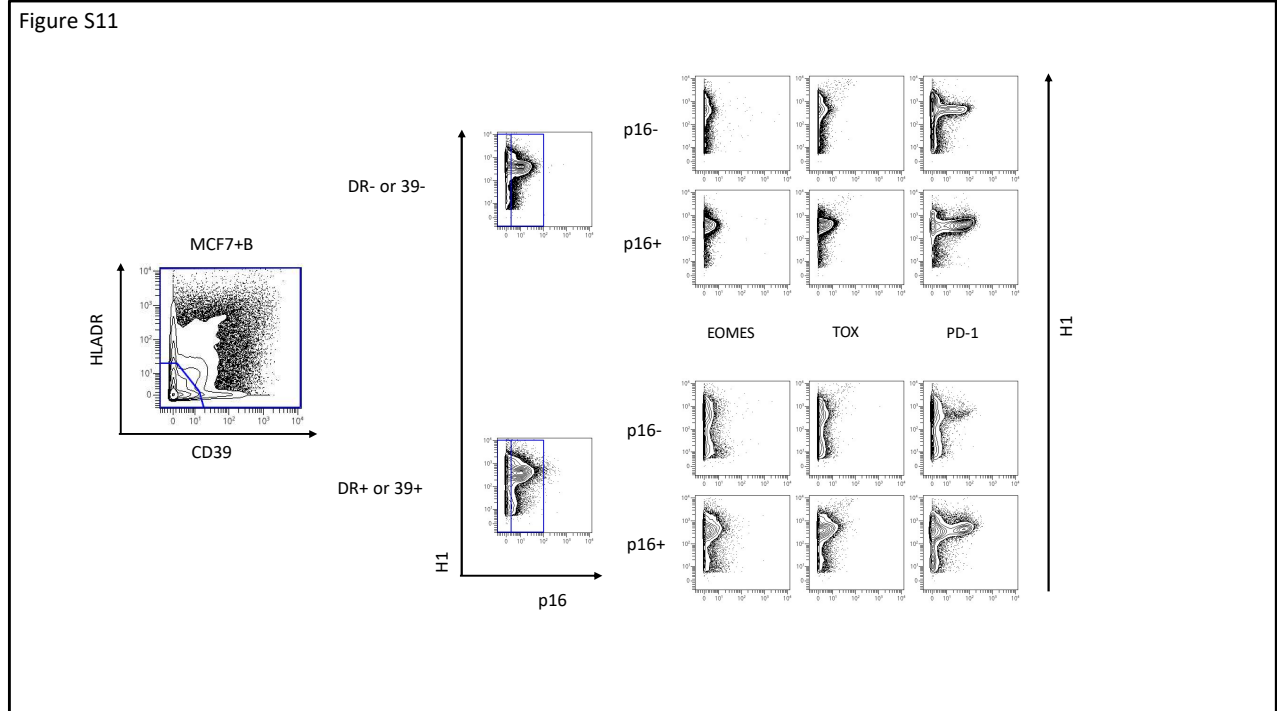

Figure S11. The co-culture and stimulation of T cells with MCF7 cells then MCF7 conditioned media demonstrated a lack of activation following antigen stimulation. This lack of activation was still associated with an increase in p16 expression along with EOMES and TOX expression. This is indicative of a suppression of activation through senescence as opposed to senescence as a consequence of repetitive stimulation

## Supplementary Table S1

| Antibody-Mass | Antibody  | Mass | Clone #  | Manufacturer |
|---------------|-----------|------|----------|--------------|
| CyclinB1-156  | CyclinB1  | 156  | V152     | Biolegend    |
| pRB-165       | pRB       | 165  | J112-906 | BD           |
| pHH3-209      | pHH3      | 209  | HTA28    | BioRad       |
| Ki67-158      | Ki67      | 158  | solA15   | eBioscience  |
| p21-166       | p21       | 166  | SXM30    | BD           |
| p16-169       | p16       | 169  | D7C1M    | CST          |
| CD26-168      | CD26      | 168  | BA5b     | Biolegend    |
| H3K4me3-112   | H3K4me3   | 112  | 42D8     | CST          |
| H3K27me3-194  | H3K27me3  | 194  | C36B11   | CST          |
| H1-198        | H1        | 198  | AE-4     | BioRad       |
| H3k9ac-116    | H3k9ac    | 116  | C5B11    | CST          |
| H3K79me2-141  | H3K79me2  | 141  | "15E8"   | CST          |
| H4K20me3-176  | H4K20me3  | 176  | 04-079   | Millipore    |
| H2AK119Ub-159 | H2AK119Ub | 159  | D27C4    | CST          |
| EOMES-163     | EOMES     | 163  | Dan11mag | Invitrogen   |
| TOX-164       | TOX       | 164  | 6E6D03   | Biolegend    |
| PD1-175       | PD1       | 175  | EH12.2H7 | Biolegend    |

## Supplementary Table S2

| UMAP Settings    |           |
|------------------|-----------|
| Neighbors        | 15        |
| Minimum Distance | 0.4       |
| Components       | 2         |
| Metric           | Euclidean |
| Learning Rate    | 1         |
| Epoch            | 200       |

| Opt-SNE Settings |      |
|------------------|------|
| Max Iterations   | 1000 |
| Opt-SNE End      | 5000 |
| Perplexity       | 30   |
| Theta            | 0.5  |
| Components       | 2    |
| Verbosity        | 25   |

| Wanderlust Settings |                      |
|---------------------|----------------------|
| Waypoints           | 250                  |
| K                   | 15                   |
| Filter              | p16+/pRb- population |

| Clustering Channels |
|---------------------|
| CD3                 |
| CD15                |
| CD45                |
| CD4                 |
| CD8                 |
| GranzymeB           |
| HLADR               |
| CD39                |
